# Supplementary material for: Arrhythmic sudden death survival prediction using deep learning analysis of scarring in the heart
Source: Springer Nature journal article supplement (doi:10.1038/s44161-022-00041-9), 2022-04-07
Supplement: 44161_2022_41_MOESM6_ESM.xlsx [file 44161_2022_41_MOESM6_ESM.xlsx]

## Sheet: 2y
fpr	tpr_internal	tpr_internal_lower	tpr_internal_upper	tpr_external	tpr_external_lower	tpr_external_upper
0	0	0	0	0	0	0
0.010101	0.571138	0.474206	0.66807	0	0	0.113495
0.020202	0.571138	0.474206	0.66807	0	0	0.113495
0.030303	0.571138	0.474206	0.66807	0	0	0.113495
0.040404	0.571138	0.474206	0.66807	0	0	0.113495
0.0505051	0.571138	0.474206	0.66807	0	0	0.113495
0.0606061	0.571138	0.474206	0.66807	0.166667	0.0531715	0.280162
0.0707071	0.656504	0.564388	0.74862	0.166667	0.0531715	0.280162
0.0808081	0.784553	0.707207	0.861899	0.166667	0.0531715	0.280162
0.0909091	0.805894	0.733196	0.878592	0.166667	0.0408898	0.292444
0.10101	0.809959	0.737195	0.882724	0.5	0.371399	0.628601
0.111111	0.809959	0.737195	0.882724	0.5	0.375135	0.624865
0.121212	0.809959	0.737195	0.882724	0.5	0.375135	0.624865
0.131313	0.809959	0.737195	0.882724	0.5	0.37364	0.62636
0.141414	0.809959	0.737195	0.882724	0.5	0.37364	0.62636
0.151515	0.809959	0.737195	0.882724	0.5	0.37364	0.62636
0.161616	0.822154	0.74991	0.894399	0.5	0.37364	0.62636
0.171717	0.83435	0.76475	0.903949	0.5	0.37364	0.62636
0.181818	0.83435	0.76475	0.903949	0.5	0.374678	0.625322
0.191919	0.83435	0.76475	0.903949	0.5	0.374678	0.625322
0.20202	0.846545	0.779798	0.913292	0.666667	0.546669	0.786664
0.212121	0.846545	0.779798	0.913292	0.666667	0.546669	0.786664
0.222222	0.846545	0.779798	0.913292	0.666667	0.547694	0.78564
0.232323	0.854675	0.788986	0.920364	0.666667	0.547694	0.78564
0.242424	0.854675	0.788986	0.920364	0.666667	0.547694	0.78564
0.252525	0.885163	0.829346	0.940979	0.666667	0.547694	0.78564
0.262626	0.885163	0.829346	0.940979	0.666667	0.547694	0.78564
0.272727	0.885163	0.829346	0.940979	0.666667	0.547694	0.78564
0.282828	0.885163	0.829346	0.940979	0.666667	0.547694	0.78564
0.292929	0.885163	0.829346	0.940979	0.666667	0.547694	0.78564
0.30303	0.885163	0.829346	0.940979	0.666667	0.55033	0.783003
0.313131	0.897358	0.843006	0.95171	0.666667	0.55033	0.783003
0.323232	0.897358	0.843006	0.95171	0.666667	0.55033	0.783003
0.333333	0.909553	0.856839	0.962267	0.666667	0.55005	0.783284
0.343434	0.909553	0.856839	0.962267	0.666667	0.55005	0.783284
0.353535	0.909553	0.856839	0.962267	0.666667	0.55005	0.783284
0.363636	0.921748	0.870861	0.972635	0.666667	0.55005	0.783284
0.373737	0.921748	0.870861	0.972635	0.666667	0.55005	0.783284
0.383838	0.921748	0.870861	0.972635	0.666667	0.55005	0.783284
0.393939	0.921748	0.870861	0.972635	0.666667	0.55005	0.783284
0.40404	0.921748	0.870861	0.972635	0.666667	0.556678	0.776655
0.414141	0.921748	0.870861	0.972635	0.666667	0.556678	0.776655
0.424242	0.931911	0.882384	0.981437	0.666667	0.556678	0.776655
0.434343	0.931911	0.882384	0.981437	0.666667	0.556678	0.776655
0.444444	0.944106	0.89992	0.988292	0.666667	0.560607	0.772726
0.454545	0.953252	0.910616	0.995888	0.666667	0.560607	0.772726
0.464646	0.965447	0.929489	1	0.666667	0.560607	0.772726
0.474747	0.977642	0.95018	1	0.666667	0.560607	0.772726
0.484848	0.977642	0.95018	1	0.666667	0.560607	0.772726
0.494949	0.977642	0.95018	1	0.666667	0.560607	0.772726
0.505051	0.98374	0.958792	1	0.666667	0.565009	0.768324
0.515152	0.98374	0.958792	1	0.666667	0.565009	0.768324
0.525253	0.98374	0.958792	1	0.666667	0.565009	0.768324
0.535354	0.98374	0.958792	1	0.666667	0.565009	0.768324
0.545455	0.98374	0.958792	1	0.833333	0.731676	0.934991
0.555556	0.98374	0.958792	1	0.833333	0.732078	0.934589
0.565657	0.98374	0.958792	1	0.833333	0.732078	0.934589
0.575758	0.98374	0.958792	1	0.833333	0.732078	0.934589
0.585859	0.995935	0.988016	1	0.833333	0.732078	0.934589
0.59596	0.995935	0.988016	1	0.833333	0.732078	0.934589
0.606061	0.995935	0.988016	1	0.833333	0.732078	0.934589
0.616162	0.995935	0.988016	1	0.833333	0.732078	0.934589
0.626263	0.995935	0.988016	1	0.833333	0.732078	0.934589
0.636364	0.995935	0.988016	1	0.833333	0.732078	0.934589
0.646465	0.995935	0.988016	1	0.833333	0.732078	0.934589
0.656566	0.995935	0.988016	1	0.833333	0.732078	0.934589
0.666667	0.995935	0.988016	1	0.833333	0.733131	0.933535
0.676768	0.995935	0.988016	1	0.833333	0.733131	0.933535
0.686869	0.995935	0.988016	1	0.833333	0.733131	0.933535
0.69697	0.995935	0.988016	1	0.833333	0.733131	0.933535
0.707071	0.995935	0.988016	1	0.833333	0.733785	0.932882
0.717172	0.995935	0.988016	1	0.833333	0.733785	0.932882
0.727273	0.995935	0.988016	1	0.833333	0.733785	0.932882
0.737374	0.995935	0.988016	1	0.833333	0.733785	0.932882
0.747475	0.995935	0.988016	1	0.833333	0.733785	0.932882
0.757576	0.995935	0.988016	1	0.833333	0.733785	0.932882
0.767677	0.995935	0.988016	1	0.833333	0.733785	0.932882
0.777778	1	1	1	0.833333	0.733785	0.932882
0.787879	1	1	1	0.833333	0.733785	0.932882
0.79798	1	1	1	0.833333	0.733785	0.932882
0.808081	1	1	1	0.833333	0.746017	0.92065
0.818182	1	1	1	0.833333	0.746017	0.92065
0.828283	1	1	1	0.833333	0.746017	0.92065
0.838384	1	1	1	0.833333	0.746017	0.92065
0.848485	1	1	1	0.833333	0.746017	0.92065
0.858586	1	1	1	0.833333	0.746017	0.92065
0.868687	1	1	1	0.833333	0.746017	0.92065
0.878788	1	1	1	0.833333	0.746017	0.92065
0.888889	1	1	1	0.833333	0.746017	0.92065
0.89899	1	1	1	0.833333	0.746017	0.92065
0.909091	1	1	1	0.833333	0.764053	0.902614
0.919192	1	1	1	0.833333	0.764053	0.902614
0.929293	1	1	1	0.833333	0.764053	0.902614
0.939394	1	1	1	1	0.930719	1
0.949495	1	1	1	1	0.930719	1
0.959596	1	1	1	1	0.930719	1
0.969697	1	1	1	1	0.930719	1
0.979798	1	1	1	1	0.930719	1
0.989899	1	1	1	1	0.930719	1
1	1	1	1	1	1	1

## Sheet: 3y
fpr	tpr_internal	tpr_internal_lower	tpr_internal_upper	tpr_external	tpr_external_lower	tpr_external_upper
0	0	0	0	0	0	0
0.010101	0.599826	0.517363	0.682289	0	0	0.0793571
0.020202	0.599826	0.517363	0.682289	0	0	0.0793571
0.030303	0.599826	0.517363	0.682289	0	0	0.0793571
0.040404	0.599826	0.517363	0.682289	0.111111	0.031754	0.190468
0.0505051	0.599826	0.517363	0.682289	0.111111	0.031754	0.190468
0.0606061	0.599826	0.517363	0.682289	0.111111	0.031754	0.190468
0.0707071	0.599826	0.517363	0.682289	0.111111	0.031754	0.190468
0.0808081	0.65191	0.574018	0.729801	0.111111	0.031754	0.190468
0.0909091	0.75434	0.688299	0.820381	0.111111	0.021214	0.201008
0.10101	0.766493	0.70168	0.831307	0.222222	0.130134	0.314311
0.111111	0.782986	0.721244	0.844728	0.222222	0.125058	0.319386
0.121212	0.782986	0.721244	0.844728	0.333333	0.236169	0.430498
0.131313	0.782986	0.721244	0.844728	0.333333	0.231144	0.435523
0.141414	0.782986	0.721244	0.844728	0.333333	0.231144	0.435523
0.151515	0.793403	0.733638	0.853168	0.333333	0.231144	0.435523
0.161616	0.793403	0.733638	0.853168	0.333333	0.231144	0.435523
0.171717	0.796875	0.7378	0.85595	0.333333	0.231144	0.435523
0.181818	0.805556	0.747377	0.863734	0.444444	0.342255	0.546634
0.191919	0.805556	0.747377	0.863734	0.444444	0.342255	0.546634
0.20202	0.8125	0.755005	0.869995	0.444444	0.339669	0.54922
0.212121	0.8125	0.755005	0.869995	0.444444	0.339669	0.54922
0.222222	0.828993	0.774212	0.883774	0.444444	0.338465	0.550424
0.232323	0.828993	0.774212	0.883774	0.444444	0.338465	0.550424
0.242424	0.828993	0.774212	0.883774	0.444444	0.338465	0.550424
0.252525	0.828993	0.774212	0.883774	0.444444	0.338013	0.550876
0.262626	0.828993	0.774212	0.883774	0.444444	0.338013	0.550876
0.272727	0.835069	0.780203	0.889935	0.444444	0.338013	0.550876
0.282828	0.835069	0.780203	0.889935	0.444444	0.338013	0.550876
0.292929	0.835069	0.780203	0.889935	0.444444	0.338013	0.550876
0.30303	0.835069	0.780203	0.889935	0.444444	0.337659	0.55123
0.313131	0.838542	0.784535	0.892548	0.444444	0.337659	0.55123
0.323232	0.838542	0.784535	0.892548	0.444444	0.337659	0.55123
0.333333	0.847222	0.7936	0.900844	0.444444	0.338388	0.550501
0.343434	0.847222	0.7936	0.900844	0.444444	0.338388	0.550501
0.353535	0.847222	0.7936	0.900844	0.444444	0.338388	0.550501
0.363636	0.855035	0.801761	0.908309	0.444444	0.338388	0.550501
0.373737	0.855035	0.801761	0.908309	0.444444	0.338388	0.550501
0.383838	0.855035	0.801761	0.908309	0.444444	0.337402	0.551487
0.393939	0.860243	0.807392	0.913095	0.444444	0.337402	0.551487
0.40404	0.860243	0.807392	0.913095	0.444444	0.338307	0.550582
0.414141	0.860243	0.807392	0.913095	0.444444	0.338307	0.550582
0.424242	0.863715	0.810939	0.916491	0.444444	0.338307	0.550582
0.434343	0.863715	0.810939	0.916491	0.555556	0.449499	0.661612
0.444444	0.863715	0.810939	0.916491	0.555556	0.450213	0.660898
0.454545	0.863715	0.810939	0.916491	0.555556	0.450719	0.660392
0.464646	0.863715	0.810939	0.916491	0.555556	0.450719	0.660392
0.474747	0.874132	0.824355	0.923909	0.555556	0.450719	0.660392
0.484848	0.874132	0.824355	0.923909	0.555556	0.450719	0.660392
0.494949	0.874132	0.824355	0.923909	0.666667	0.56183	0.771503
0.505051	0.87934	0.830097	0.928584	0.666667	0.562647	0.770686
0.515152	0.87934	0.830097	0.928584	0.666667	0.562647	0.770686
0.525253	0.87934	0.830097	0.928584	0.666667	0.562647	0.770686
0.535354	0.87934	0.830097	0.928584	0.666667	0.562647	0.770686
0.545455	0.884549	0.835867	0.933231	0.666667	0.562647	0.770686
0.555556	0.884549	0.835867	0.933231	0.666667	0.561728	0.771605
0.565657	0.884549	0.835867	0.933231	0.666667	0.561728	0.771605
0.575758	0.884549	0.835867	0.933231	0.666667	0.56125	0.772084
0.585859	0.889757	0.841666	0.937848	0.666667	0.56125	0.772084
0.59596	0.889757	0.841666	0.937848	0.666667	0.56125	0.772084
0.606061	0.889757	0.841666	0.937848	0.666667	0.56223	0.771103
0.616162	0.889757	0.841666	0.937848	0.666667	0.56223	0.771103
0.626263	0.889757	0.841666	0.937848	0.666667	0.56223	0.771103
0.636364	0.889757	0.841666	0.937848	0.666667	0.56223	0.771103
0.646465	0.889757	0.841666	0.937848	0.666667	0.56223	0.771103
0.656566	0.889757	0.841666	0.937848	0.666667	0.56223	0.771103
0.666667	0.889757	0.841666	0.937848	0.666667	0.56332	0.770013
0.676768	0.889757	0.841666	0.937848	0.666667	0.56332	0.770013
0.686869	0.889757	0.841666	0.937848	0.666667	0.56332	0.770013
0.69697	0.889757	0.841666	0.937848	0.666667	0.56332	0.770013
0.707071	0.889757	0.841666	0.937848	0.666667	0.56728	0.766053
0.717172	0.889757	0.841666	0.937848	0.777778	0.678391	0.877165
0.727273	0.889757	0.841666	0.937848	0.777778	0.678391	0.877165
0.737374	0.889757	0.841666	0.937848	0.777778	0.678391	0.877165
0.747475	0.889757	0.841666	0.937848	0.777778	0.678391	0.877165
0.757576	0.896701	0.848957	0.944445	0.777778	0.678391	0.877165
0.767677	0.896701	0.848957	0.944445	0.777778	0.678391	0.877165
0.777778	0.899306	0.851612	0.946999	0.777778	0.681655	0.873901
0.787879	0.899306	0.851612	0.946999	0.777778	0.681655	0.873901
0.79798	0.899306	0.851612	0.946999	0.777778	0.681655	0.873901
0.808081	0.899306	0.851612	0.946999	0.777778	0.687722	0.867834
0.818182	0.899306	0.851612	0.946999	0.777778	0.687722	0.867834
0.828283	0.899306	0.851612	0.946999	0.777778	0.687722	0.867834
0.838384	0.904514	0.857489	0.951539	0.777778	0.687722	0.867834
0.848485	0.904514	0.857489	0.951539	0.777778	0.687722	0.867834
0.858586	0.904514	0.857489	0.951539	0.777778	0.687722	0.867834
0.868687	0.904514	0.857489	0.951539	0.777778	0.687722	0.867834
0.878788	0.904514	0.857489	0.951539	0.777778	0.68785	0.867705
0.888889	0.904514	0.857489	0.951539	0.777778	0.690287	0.865269
0.89899	0.904514	0.857489	0.951539	0.777778	0.690287	0.865269
0.909091	0.904514	0.857489	0.951539	0.777778	0.696507	0.859048
0.919192	0.918403	0.87307	0.963736	0.777778	0.696507	0.859048
0.929293	0.939236	0.902629	0.975843	0.888889	0.807619	0.970159
0.939394	0.939236	0.902629	0.975843	0.888889	0.807619	0.970159
0.949495	0.939236	0.902629	0.975843	0.888889	0.807619	0.970159
0.959596	0.939236	0.902629	0.975843	0.888889	0.807619	0.970159
0.969697	0.939236	0.902629	0.975843	0.888889	0.807619	0.970159
0.979798	0.939236	0.902629	0.975843	0.888889	0.807619	0.970159
0.989899	0.939236	0.902629	0.975843	1	0.91873	1
1	1	1	1	1	1	1

## Sheet: 4y
fpr	tpr_internal	tpr_internal_lower	tpr_internal_upper	tpr_external	tpr_external_lower	tpr_external_upper
0	0	0	0	0	0	0
0.010101	0.569588	0.492511	0.646665	0	0	0.0753018
0.020202	0.569588	0.492511	0.646665	0	0	0.0753018
0.030303	0.569588	0.492511	0.646665	0	0	0.0753018
0.040404	0.569588	0.492511	0.646665	0.0909091	0.0156072	0.166211
0.0505051	0.569588	0.492511	0.646665	0.0909091	0.0156072	0.166211
0.0606061	0.569588	0.492511	0.646665	0.0909091	0.0156072	0.166211
0.0707071	0.569588	0.492511	0.646665	0.0909091	0.0156072	0.166211
0.0808081	0.636598	0.565271	0.707924	0.181818	0.106516	0.25712
0.0909091	0.725086	0.661851	0.788321	0.272727	0.193347	0.352107
0.10101	0.733677	0.670961	0.796393	0.272727	0.191434	0.35402
0.111111	0.761168	0.702132	0.820204	0.454545	0.367801	0.54129
0.121212	0.761168	0.702132	0.820204	0.454545	0.367801	0.54129
0.131313	0.769759	0.71149	0.828029	0.454545	0.363761	0.54533
0.141414	0.769759	0.71149	0.828029	0.454545	0.363761	0.54533
0.151515	0.769759	0.71149	0.828029	0.454545	0.363761	0.54533
0.161616	0.769759	0.71149	0.828029	0.454545	0.363761	0.54533
0.171717	0.769759	0.71149	0.828029	0.454545	0.363761	0.54533
0.181818	0.778351	0.722612	0.834089	0.454545	0.362956	0.546135
0.191919	0.778351	0.722612	0.834089	0.454545	0.362956	0.546135
0.20202	0.790378	0.735345	0.845411	0.454545	0.360995	0.548096
0.212121	0.790378	0.735345	0.845411	0.454545	0.360995	0.548096
0.222222	0.804124	0.750397	0.85785	0.454545	0.36001	0.549081
0.232323	0.80756	0.753764	0.861356	0.454545	0.36001	0.549081
0.242424	0.80756	0.753764	0.861356	0.454545	0.36001	0.549081
0.252525	0.80756	0.753764	0.861356	0.454545	0.358818	0.550273
0.262626	0.80756	0.753764	0.861356	0.454545	0.358818	0.550273
0.272727	0.813574	0.760446	0.866702	0.454545	0.358818	0.550273
0.282828	0.813574	0.760446	0.866702	0.454545	0.358818	0.550273
0.292929	0.813574	0.760446	0.866702	0.454545	0.358818	0.550273
0.30303	0.813574	0.760446	0.866702	0.454545	0.358244	0.550847
0.313131	0.81701	0.764696	0.869325	0.454545	0.358244	0.550847
0.323232	0.81701	0.764696	0.869325	0.454545	0.358244	0.550847
0.333333	0.822165	0.770123	0.874207	0.454545	0.358188	0.550903
0.343434	0.822165	0.770123	0.874207	0.454545	0.358188	0.550903
0.353535	0.822165	0.770123	0.874207	0.454545	0.358188	0.550903
0.363636	0.834192	0.783315	0.88507	0.454545	0.358188	0.550903
0.373737	0.834192	0.783315	0.88507	0.454545	0.358188	0.550903
0.383838	0.834192	0.783315	0.88507	0.454545	0.356874	0.552217
0.393939	0.839347	0.788819	0.889875	0.454545	0.356874	0.552217
0.40404	0.839347	0.788819	0.889875	0.454545	0.357507	0.551584
0.414141	0.839347	0.788819	0.889875	0.454545	0.357507	0.551584
0.424242	0.844502	0.794346	0.894657	0.545455	0.448416	0.642493
0.434343	0.844502	0.794346	0.894657	0.545455	0.448016	0.642893
0.444444	0.858247	0.808974	0.907521	0.545455	0.449826	0.641083
0.454545	0.860825	0.811519	0.910131	0.545455	0.450392	0.640517
0.464646	0.860825	0.811519	0.910131	0.545455	0.450392	0.640517
0.474747	0.871134	0.824958	0.91731	0.545455	0.450392	0.640517
0.484848	0.871134	0.824958	0.91731	0.545455	0.450392	0.640517
0.494949	0.871134	0.824958	0.91731	0.727273	0.63221	0.822335
0.505051	0.876289	0.830663	0.921914	0.727273	0.634328	0.820218
0.515152	0.876289	0.830663	0.921914	0.727273	0.634328	0.820218
0.525253	0.876289	0.830663	0.921914	0.727273	0.634328	0.820218
0.535354	0.876289	0.830663	0.921914	0.727273	0.634328	0.820218
0.545455	0.881443	0.836398	0.926489	0.727273	0.634328	0.820218
0.555556	0.88488	0.839985	0.929774	0.727273	0.634046	0.820499
0.565657	0.88488	0.839985	0.929774	0.727273	0.634046	0.820499
0.575758	0.88488	0.839985	0.929774	0.727273	0.634046	0.820499
0.585859	0.88488	0.839985	0.929774	0.727273	0.634046	0.820499
0.59596	0.88488	0.839985	0.929774	0.727273	0.634046	0.820499
0.606061	0.88488	0.839985	0.929774	0.727273	0.635839	0.818706
0.616162	0.88488	0.839985	0.929774	0.727273	0.635839	0.818706
0.626263	0.88488	0.839985	0.929774	0.727273	0.635497	0.819048
0.636364	0.888316	0.843583	0.933049	0.727273	0.635497	0.819048
0.646465	0.888316	0.843583	0.933049	0.727273	0.635497	0.819048
0.656566	0.888316	0.843583	0.933049	0.727273	0.635497	0.819048
0.666667	0.900344	0.856653	0.944035	0.727273	0.63943	0.815115
0.676768	0.900344	0.856653	0.944035	0.727273	0.63943	0.815115
0.686869	0.900344	0.856653	0.944035	0.727273	0.63943	0.815115
0.69697	0.900344	0.856653	0.944035	0.727273	0.63943	0.815115
0.707071	0.900344	0.856653	0.944035	0.727273	0.644248	0.810298
0.717172	0.900344	0.856653	0.944035	0.818182	0.735157	0.901207
0.727273	0.905498	0.862528	0.948469	0.818182	0.735157	0.901207
0.737374	0.905498	0.862528	0.948469	0.818182	0.735157	0.901207
0.747475	0.905498	0.862528	0.948469	0.818182	0.735157	0.901207
0.757576	0.908935	0.866199	0.951671	0.818182	0.737102	0.899262
0.767677	0.908935	0.866199	0.951671	0.818182	0.737102	0.899262
0.777778	0.908935	0.866199	0.951671	0.818182	0.737239	0.899125
0.787879	0.908935	0.866199	0.951671	0.818182	0.737239	0.899125
0.79798	0.908935	0.866199	0.951671	0.818182	0.737239	0.899125
0.808081	0.908935	0.866199	0.951671	0.818182	0.741709	0.894654
0.818182	0.920103	0.878521	0.961685	0.818182	0.741709	0.894654
0.828283	0.920103	0.878521	0.961685	0.818182	0.741709	0.894654
0.838384	0.920103	0.878521	0.961685	0.818182	0.741709	0.894654
0.848485	0.920103	0.878521	0.961685	0.818182	0.741709	0.894654
0.858586	0.930412	0.89324	0.967585	0.818182	0.741709	0.894654
0.868687	0.930412	0.89324	0.967585	0.818182	0.741709	0.894654
0.878788	0.930412	0.89324	0.967585	0.818182	0.744416	0.891947
0.888889	0.933849	0.89704	0.970658	0.818182	0.747432	0.888931
0.89899	0.933849	0.89704	0.970658	0.909091	0.838341	0.97984
0.909091	0.936426	0.899784	0.973068	0.909091	0.851318	0.966863
0.919192	0.941581	0.906008	0.977154	0.909091	0.851318	0.966863
0.929293	0.95189	0.921879	0.981901	0.909091	0.851318	0.966863
0.939394	0.95189	0.921879	0.981901	0.909091	0.851318	0.966863
0.949495	0.95189	0.921879	0.981901	1	0.942228	1
0.959596	0.95189	0.921879	0.981901	1	0.942228	1
0.969697	0.95189	0.921879	0.981901	1	0.942228	1
0.979798	0.95189	0.921879	0.981901	1	0.942228	1
0.989899	0.95189	0.921879	0.981901	1	0.942228	1
1	1	1	1	1	1	1

## Sheet: 5y
fpr	tpr_internal	tpr_internal_lower	tpr_internal_upper	tpr_external	tpr_external_lower	tpr_external_upper
0	0	0	0	0	0	0
0.010101	0.594949	0.527916	0.661983	0	0	0.0668165
0.020202	0.594949	0.527916	0.661983	0	0	0.0668165
0.030303	0.594949	0.527916	0.661983	0	0	0.0668165
0.040404	0.594949	0.527916	0.661983	0.0714286	0.00461203	0.138245
0.0505051	0.594949	0.527916	0.661983	0.0714286	0.00461203	0.138245
0.0606061	0.594949	0.527916	0.661983	0.142857	0.0760406	0.209674
0.0707071	0.594949	0.527916	0.661983	0.142857	0.0760406	0.209674
0.0808081	0.610101	0.544718	0.675484	0.214286	0.147469	0.281102
0.0909091	0.669865	0.607847	0.731883	0.214286	0.143432	0.28514
0.10101	0.680808	0.617912	0.743704	0.214286	0.1415	0.287071
0.111111	0.717003	0.657038	0.776969	0.214286	0.133828	0.294744
0.121212	0.717003	0.657038	0.776969	0.214286	0.133828	0.294744
0.131313	0.737205	0.680622	0.793789	0.428571	0.346599	0.510544
0.141414	0.737205	0.680622	0.793789	0.428571	0.346599	0.510544
0.151515	0.745623	0.69045	0.800796	0.428571	0.345463	0.51168
0.161616	0.750673	0.695494	0.805853	0.428571	0.345463	0.51168
0.171717	0.759933	0.705408	0.814457	0.428571	0.345463	0.51168
0.181818	0.7633	0.708604	0.817995	0.5	0.416183	0.583817
0.191919	0.7633	0.708604	0.817995	0.5	0.416183	0.583817
0.20202	0.770034	0.71502	0.825047	0.5	0.415911	0.584089
0.212121	0.770034	0.71502	0.825047	0.5	0.415911	0.584089
0.222222	0.786869	0.73443	0.839307	0.5	0.414428	0.585572
0.232323	0.786869	0.73443	0.839307	0.5	0.414428	0.585572
0.242424	0.786869	0.73443	0.839307	0.5	0.414428	0.585572
0.252525	0.789394	0.737261	0.841527	0.5	0.414032	0.585968
0.262626	0.789394	0.737261	0.841527	0.5	0.414032	0.585968
0.272727	0.795286	0.744211	0.846361	0.5	0.414032	0.585968
0.282828	0.795286	0.744211	0.846361	0.5	0.414032	0.585968
0.292929	0.80202	0.751625	0.852415	0.5	0.413283	0.586717
0.30303	0.805387	0.755786	0.854989	0.5	0.413055	0.586945
0.313131	0.805387	0.755786	0.854989	0.5	0.413055	0.586945
0.323232	0.805387	0.755786	0.854989	0.5	0.413055	0.586945
0.333333	0.810438	0.761066	0.85981	0.5	0.414457	0.585543
0.343434	0.810438	0.761066	0.85981	0.5	0.414457	0.585543
0.353535	0.810438	0.761066	0.85981	0.5	0.414457	0.585543
0.363636	0.820875	0.772224	0.869527	0.5	0.414457	0.585543
0.373737	0.820875	0.772224	0.869527	0.5	0.414457	0.585543
0.383838	0.820875	0.772224	0.869527	0.5	0.413482	0.586518
0.393939	0.820875	0.772224	0.869527	0.5	0.413482	0.586518
0.40404	0.824242	0.776465	0.87202	0.5	0.413482	0.586518
0.414141	0.824242	0.776465	0.87202	0.5	0.413482	0.586518
0.424242	0.824242	0.776465	0.87202	0.571429	0.48491	0.657947
0.434343	0.835185	0.78815	0.88222	0.571429	0.483862	0.658995
0.444444	0.840236	0.793568	0.886904	0.571429	0.483756	0.659101
0.454545	0.845286	0.799009	0.891563	0.571429	0.483756	0.659101
0.464646	0.845286	0.799009	0.891563	0.571429	0.483756	0.659101
0.474747	0.845286	0.799009	0.891563	0.571429	0.483756	0.659101
0.484848	0.845286	0.799009	0.891563	0.571429	0.483756	0.659101
0.494949	0.845286	0.799009	0.891563	0.571429	0.483756	0.659101
0.505051	0.851178	0.804887	0.89747	0.642857	0.558287	0.727427
0.515152	0.851178	0.804887	0.89747	0.714286	0.629716	0.798856
0.525253	0.851178	0.804887	0.89747	0.714286	0.629716	0.798856
0.535354	0.851178	0.804887	0.89747	0.714286	0.629716	0.798856
0.545455	0.853704	0.807364	0.900043	0.714286	0.629716	0.798856
0.555556	0.853704	0.807364	0.900043	0.714286	0.630338	0.798234
0.565657	0.853704	0.807364	0.900043	0.714286	0.630338	0.798234
0.575758	0.853704	0.807364	0.900043	0.714286	0.630338	0.798234
0.585859	0.853704	0.807364	0.900043	0.714286	0.631283	0.797288
0.59596	0.853704	0.807364	0.900043	0.714286	0.631283	0.797288
0.606061	0.853704	0.807364	0.900043	0.714286	0.6323	0.796272
0.616162	0.858754	0.812866	0.904642	0.714286	0.6323	0.796272
0.626263	0.862121	0.816311	0.907932	0.714286	0.631663	0.796908
0.636364	0.864141	0.818611	0.909672	0.714286	0.631663	0.796908
0.646465	0.864141	0.818611	0.909672	0.714286	0.631663	0.796908
0.656566	0.864141	0.818611	0.909672	0.714286	0.631663	0.796908
0.666667	0.864141	0.818611	0.909672	0.714286	0.637192	0.79138
0.676768	0.864141	0.818611	0.909672	0.785714	0.70862	0.862808
0.686869	0.864141	0.818611	0.909672	0.785714	0.70862	0.862808
0.69697	0.864141	0.818611	0.909672	0.785714	0.70862	0.862808
0.707071	0.864141	0.818611	0.909672	0.785714	0.712023	0.859406
0.717172	0.867508	0.822071	0.912946	0.785714	0.715872	0.855556
0.727273	0.878451	0.833659	0.923244	0.785714	0.715872	0.855556
0.737374	0.878451	0.833659	0.923244	0.785714	0.715872	0.855556
0.747475	0.878451	0.833659	0.923244	0.785714	0.715872	0.855556
0.757576	0.890236	0.847341	0.933131	0.785714	0.720584	0.850844
0.767677	0.890236	0.847341	0.933131	0.785714	0.720584	0.850844
0.777778	0.897811	0.855624	0.939999	0.857143	0.797757	0.916529
0.787879	0.897811	0.855624	0.939999	0.928571	0.869185	0.987958
0.79798	0.897811	0.855624	0.939999	0.928571	0.869185	0.987958
0.808081	0.901178	0.859196	0.943161	0.928571	0.869682	0.987461
0.818182	0.906229	0.864971	0.947487	0.928571	0.869682	0.987461
0.828283	0.906229	0.864971	0.947487	0.928571	0.869682	0.987461
0.838384	0.912121	0.871185	0.953057	0.928571	0.869682	0.987461
0.848485	0.912121	0.871185	0.953057	0.928571	0.869682	0.987461
0.858586	0.917172	0.876426	0.957917	1	0.944775	1
0.868687	0.917172	0.876426	0.957917	1	0.944775	1
0.878788	0.923064	0.882707	0.963421	1	0.946979	1
0.888889	0.929798	0.890048	0.969548	1	0.959538	1
0.89899	0.929798	0.890048	0.969548	1	0.959538	1
0.909091	0.943266	0.908468	0.978064	1	0.966381	1
0.919192	0.953367	0.924051	0.982683	1	0.966381	1
0.929293	0.953367	0.924051	0.982683	1	0.966381	1
0.939394	0.953367	0.924051	0.982683	1	0.966381	1
0.949495	0.953367	0.924051	0.982683	1	0.966381	1
0.959596	0.953367	0.924051	0.982683	1	0.966381	1
0.969697	0.953367	0.924051	0.982683	1	0.966381	1
0.979798	0.953367	0.924051	0.982683	1	0.966381	1
0.989899	0.953367	0.924051	0.982683	1	0.966381	1
1	1	1	1	1	1	1

## Sheet: 6y
fpr	tpr_internal	tpr_internal_lower	tpr_internal_upper	tpr_external	tpr_external_lower	tpr_external_upper
0	0	0	0	0	0	0
0.010101	0.599	0.537057	0.660943	0	0	0.0633543
0.020202	0.599	0.537057	0.660943	0	0	0.0633543
0.030303	0.599	0.537057	0.660943	0	0	0.0633543
0.040404	0.599	0.537057	0.660943	0.105263	0.0419089	0.168617
0.0505051	0.599	0.537057	0.660943	0.157895	0.0945404	0.221249
0.0606061	0.599	0.537057	0.660943	0.157895	0.0945404	0.221249
0.0707071	0.599	0.537057	0.660943	0.157895	0.0945404	0.221249
0.0808081	0.614	0.552273	0.675727	0.210526	0.147172	0.273881
0.0909091	0.634	0.57226	0.69574	0.263158	0.198024	0.328292
0.10101	0.637333	0.575876	0.698791	0.263158	0.196354	0.329962
0.111111	0.670667	0.610878	0.730456	0.263158	0.189981	0.336334
0.121212	0.670667	0.610878	0.730456	0.421053	0.347876	0.494229
0.131313	0.704833	0.648013	0.761654	0.421053	0.345818	0.496287
0.141414	0.704833	0.648013	0.761654	0.421053	0.345818	0.496287
0.151515	0.720667	0.666392	0.774942	0.473684	0.399256	0.548112
0.161616	0.720667	0.666392	0.774942	0.473684	0.399256	0.548112
0.171717	0.724	0.670252	0.777748	0.526316	0.450341	0.602291
0.181818	0.727333	0.674126	0.780541	0.526316	0.450341	0.602291
0.191919	0.727333	0.674126	0.780541	0.526316	0.450341	0.602291
0.20202	0.7365	0.682551	0.790449	0.526316	0.450276	0.602355
0.212121	0.7365	0.682551	0.790449	0.526316	0.450276	0.602355
0.222222	0.760667	0.708121	0.813212	0.526316	0.449	0.603632
0.232323	0.760667	0.708121	0.813212	0.526316	0.449	0.603632
0.242424	0.760667	0.708121	0.813212	0.578947	0.501631	0.656263
0.252525	0.7765	0.723738	0.829262	0.631579	0.557171	0.705987
0.262626	0.7765	0.723738	0.829262	0.631579	0.557171	0.705987
0.272727	0.783167	0.730957	0.835376	0.631579	0.557171	0.705987
0.282828	0.783167	0.730957	0.835376	0.631579	0.557171	0.705987
0.292929	0.792333	0.741864	0.842803	0.631579	0.559767	0.703391
0.30303	0.805667	0.758329	0.853005	0.631579	0.559767	0.703391
0.313131	0.805667	0.758329	0.853005	0.631579	0.559767	0.703391
0.323232	0.805667	0.758329	0.853005	0.631579	0.559767	0.703391
0.333333	0.834333	0.790757	0.87791	0.631579	0.562409	0.700749
0.343434	0.834333	0.790757	0.87791	0.631579	0.562409	0.700749
0.353535	0.834333	0.790757	0.87791	0.631579	0.562409	0.700749
0.363636	0.837667	0.794098	0.881235	0.631579	0.562409	0.700749
0.373737	0.837667	0.794098	0.881235	0.631579	0.562409	0.700749
0.383838	0.842667	0.799497	0.885836	0.684211	0.615284	0.753137
0.393939	0.842667	0.799497	0.885836	0.684211	0.615284	0.753137
0.40404	0.851	0.809316	0.892684	0.684211	0.615284	0.753137
0.414141	0.851	0.809316	0.892684	0.684211	0.615284	0.753137
0.424242	0.851	0.809316	0.892684	0.684211	0.615284	0.753137
0.434343	0.851	0.809316	0.892684	0.684211	0.614438	0.753983
0.444444	0.854333	0.812708	0.895958	0.684211	0.613726	0.754695
0.454545	0.854333	0.812708	0.895958	0.684211	0.613726	0.754695
0.464646	0.854333	0.812708	0.895958	0.736842	0.666358	0.807326
0.474747	0.854333	0.812708	0.895958	0.736842	0.666358	0.807326
0.484848	0.854333	0.812708	0.895958	0.789474	0.718989	0.859958
0.494949	0.854333	0.812708	0.895958	0.789474	0.718989	0.859958
0.505051	0.869333	0.828495	0.910172	0.842105	0.776266	0.907945
0.515152	0.869333	0.828495	0.910172	0.842105	0.776266	0.907945
0.525253	0.869333	0.828495	0.910172	0.842105	0.776266	0.907945
0.535354	0.869333	0.828495	0.910172	0.842105	0.776266	0.907945
0.545455	0.869333	0.828495	0.910172	0.842105	0.776266	0.907945
0.555556	0.869333	0.828495	0.910172	0.842105	0.775984	0.908226
0.565657	0.869333	0.828495	0.910172	0.894737	0.828616	0.960858
0.575758	0.872667	0.831947	0.913387	0.894737	0.830281	0.959193
0.585859	0.876	0.835409	0.916591	0.894737	0.830281	0.959193
0.59596	0.876	0.835409	0.916591	0.894737	0.830281	0.959193
0.606061	0.876	0.835409	0.916591	0.894737	0.832136	0.957337
0.616162	0.876	0.835409	0.916591	0.894737	0.832136	0.957337
0.626263	0.876	0.835409	0.916591	0.894737	0.834307	0.955167
0.636364	0.876	0.835409	0.916591	0.894737	0.834307	0.955167
0.646465	0.876	0.835409	0.916591	0.894737	0.834307	0.955167
0.656566	0.876	0.835409	0.916591	0.894737	0.834307	0.955167
0.666667	0.886333	0.846269	0.926398	0.894737	0.842398	0.947076
0.676768	0.886333	0.846269	0.926398	0.894737	0.842398	0.947076
0.686869	0.886333	0.846269	0.926398	0.894737	0.842398	0.947076
0.69697	0.886333	0.846269	0.926398	0.894737	0.842398	0.947076
0.707071	0.889667	0.849777	0.929556	0.894737	0.842398	0.947076
0.717172	0.889667	0.849777	0.929556	0.894737	0.851316	0.938158
0.727273	0.892167	0.852316	0.932018	0.894737	0.851316	0.938158
0.737374	0.892167	0.852316	0.932018	0.894737	0.851316	0.938158
0.747475	0.892167	0.852316	0.932018	0.894737	0.851316	0.938158
0.757576	0.897167	0.858019	0.936314	0.947368	0.905586	0.989151
0.767677	0.897167	0.858019	0.936314	0.947368	0.905586	0.989151
0.777778	0.908	0.869909	0.946091	0.947368	0.910421	0.984316
0.787879	0.908	0.869909	0.946091	0.947368	0.910421	0.984316
0.79798	0.908	0.869909	0.946091	0.947368	0.910421	0.984316
0.808081	0.913	0.875728	0.950272	0.947368	0.910421	0.984316
0.818182	0.913	0.875728	0.950272	1	0.963052	1
0.828283	0.913	0.875728	0.950272	1	0.963052	1
0.838384	0.922167	0.885589	0.958744	1	0.963052	1
0.848485	0.922167	0.885589	0.958744	1	0.963052	1
0.858586	0.939667	0.904585	0.974748	1	0.963052	1
0.868687	0.939667	0.904585	0.974748	1	0.963052	1
0.878788	0.939667	0.904585	0.974748	1	0.968074	1
0.888889	0.949667	0.919849	0.979484	1	0.968074	1
0.89899	0.949667	0.919849	0.979484	1	0.968074	1
0.909091	0.959667	0.931456	0.987878	1	0.974804	1
0.919192	0.959667	0.931456	0.987878	1	0.974804	1
0.929293	0.959667	0.931456	0.987878	1	0.974804	1
0.939394	0.959667	0.931456	0.987878	1	0.974804	1
0.949495	0.959667	0.931456	0.987878	1	0.974804	1
0.959596	0.959667	0.931456	0.987878	1	0.974804	1
0.969697	0.959667	0.931456	0.987878	1	0.974804	1
0.979798	0.959667	0.931456	0.987878	1	0.974804	1
0.989899	0.959667	0.931456	0.987878	1	0.974804	1
1	1	1	1	1	1	1

## Sheet: 7y
fpr	tpr_internal	tpr_internal_lower	tpr_internal_upper	tpr_external	tpr_external_lower	tpr_external_upper
0	0	0	0	0	0	0
0.010101	0.643	0.587027	0.698973	0	0	0.0634594
0.020202	0.643	0.587027	0.698973	0	0	0.0634594
0.030303	0.643	0.587027	0.698973	0	0	0.0634594
0.040404	0.643	0.587027	0.698973	0	0	0.0634594
0.0505051	0.643	0.587027	0.698973	0.105263	0.0418037	0.168723
0.0606061	0.643	0.587027	0.698973	0.210526	0.147067	0.273986
0.0707071	0.643	0.587027	0.698973	0.210526	0.147067	0.273986
0.0808081	0.643	0.587027	0.698973	0.210526	0.147067	0.273986
0.0909091	0.651333	0.594587	0.70808	0.210526	0.147067	0.273986
0.10101	0.651333	0.594587	0.70808	0.263158	0.199698	0.326617
0.111111	0.659667	0.603804	0.715529	0.263158	0.195955	0.330361
0.121212	0.659667	0.603804	0.715529	0.263158	0.195955	0.330361
0.131313	0.681333	0.62659	0.736077	0.421053	0.348668	0.493437
0.141414	0.681333	0.62659	0.736077	0.473684	0.4013	0.546069
0.151515	0.7165	0.66374	0.76926	0.473684	0.40181	0.545558
0.161616	0.7165	0.66374	0.76926	0.473684	0.40181	0.545558
0.171717	0.740667	0.690024	0.791309	0.473684	0.400445	0.546923
0.181818	0.740667	0.690024	0.791309	0.473684	0.400445	0.546923
0.191919	0.740667	0.690024	0.791309	0.526316	0.453077	0.599555
0.20202	0.754833	0.705312	0.804355	0.526316	0.452343	0.600288
0.212121	0.754833	0.705312	0.804355	0.526316	0.452343	0.600288
0.222222	0.763167	0.713007	0.813326	0.526316	0.452305	0.600326
0.232323	0.763167	0.713007	0.813326	0.526316	0.452305	0.600326
0.242424	0.763167	0.713007	0.813326	0.526316	0.452305	0.600326
0.252525	0.784833	0.737378	0.832288	0.526316	0.450646	0.601985
0.262626	0.784833	0.737378	0.832288	0.526316	0.450646	0.601985
0.272727	0.788167	0.741491	0.834842	0.578947	0.503278	0.654617
0.282828	0.788167	0.741491	0.834842	0.578947	0.503278	0.654617
0.292929	0.8065	0.760313	0.852687	0.578947	0.508188	0.649707
0.30303	0.8065	0.760313	0.852687	0.578947	0.508188	0.649707
0.313131	0.8065	0.760313	0.852687	0.631579	0.56082	0.702338
0.323232	0.8065	0.760313	0.852687	0.631579	0.56082	0.702338
0.333333	0.829833	0.786378	0.873289	0.631579	0.560617	0.702541
0.343434	0.829833	0.786378	0.873289	0.631579	0.560617	0.702541
0.353535	0.829833	0.786378	0.873289	0.631579	0.560617	0.702541
0.363636	0.833167	0.789706	0.876627	0.631579	0.560617	0.702541
0.373737	0.833167	0.789706	0.876627	0.631579	0.560617	0.702541
0.383838	0.855167	0.81536	0.894973	0.631579	0.561442	0.701716
0.393939	0.855167	0.81536	0.894973	0.631579	0.561442	0.701716
0.40404	0.860167	0.822125	0.898208	0.631579	0.561442	0.701716
0.414141	0.860167	0.822125	0.898208	0.631579	0.561442	0.701716
0.424242	0.860167	0.822125	0.898208	0.684211	0.614074	0.754347
0.434343	0.862667	0.824591	0.900742	0.684211	0.61465	0.753772
0.444444	0.866	0.82917	0.90283	0.684211	0.614388	0.754033
0.454545	0.866	0.82917	0.90283	0.736842	0.667019	0.806665
0.464646	0.866	0.82917	0.90283	0.736842	0.667019	0.806665
0.474747	0.866	0.82917	0.90283	0.736842	0.667019	0.806665
0.484848	0.866	0.82917	0.90283	0.736842	0.667019	0.806665
0.494949	0.866	0.82917	0.90283	0.789474	0.719651	0.859296
0.505051	0.8835	0.847993	0.919007	0.789474	0.723181	0.855766
0.515152	0.8835	0.847993	0.919007	0.789474	0.723181	0.855766
0.525253	0.8835	0.847993	0.919007	0.842105	0.775813	0.908398
0.535354	0.8835	0.847993	0.919007	0.842105	0.775813	0.908398
0.545455	0.8835	0.847993	0.919007	0.842105	0.775813	0.908398
0.555556	0.886	0.850519	0.921481	0.842105	0.775813	0.908398
0.565657	0.886	0.850519	0.921481	0.894737	0.828444	0.961029
0.575758	0.8885	0.853053	0.923947	0.894737	0.831981	0.957492
0.585859	0.8885	0.853053	0.923947	0.894737	0.831981	0.957492
0.59596	0.8885	0.853053	0.923947	0.894737	0.831981	0.957492
0.606061	0.891	0.855593	0.926407	0.894737	0.831981	0.957492
0.616162	0.891	0.855593	0.926407	0.894737	0.831981	0.957492
0.626263	0.894333	0.859141	0.929526	0.894737	0.836945	0.952528
0.636364	0.894333	0.859141	0.929526	0.894737	0.836945	0.952528
0.646465	0.894333	0.859141	0.929526	0.894737	0.836945	0.952528
0.656566	0.894333	0.859141	0.929526	0.894737	0.836945	0.952528
0.666667	0.899333	0.864261	0.934406	0.894737	0.845024	0.94445
0.676768	0.899333	0.864261	0.934406	0.894737	0.845024	0.94445
0.686869	0.899333	0.864261	0.934406	0.894737	0.845024	0.94445
0.69697	0.899333	0.864261	0.934406	0.894737	0.845024	0.94445
0.707071	0.899333	0.864261	0.934406	0.894737	0.845024	0.94445
0.717172	0.902667	0.867842	0.937492	0.894737	0.849025	0.940448
0.727273	0.906	0.871437	0.940563	0.894737	0.849025	0.940448
0.737374	0.906	0.871437	0.940563	0.894737	0.849025	0.940448
0.747475	0.906	0.871437	0.940563	0.894737	0.849025	0.940448
0.757576	0.918333	0.884783	0.951884	0.894737	0.849025	0.940448
0.767677	0.918333	0.884783	0.951884	0.947368	0.901657	0.99308
0.777778	0.918333	0.884783	0.951884	0.947368	0.905586	0.989151
0.787879	0.918333	0.884783	0.951884	0.947368	0.905586	0.989151
0.79798	0.918333	0.884783	0.951884	1	0.958217	1
0.808081	0.9275	0.89478	0.96022	1	0.958217	1
0.818182	0.9275	0.89478	0.96022	1	0.958217	1
0.828283	0.9275	0.89478	0.96022	1	0.958217	1
0.838384	0.935	0.90278	0.96722	1	0.966487	1
0.848485	0.935	0.90278	0.96722	1	0.966487	1
0.858586	0.95	0.925015	0.974985	1	0.974054	1
0.868687	0.95	0.925015	0.974985	1	0.974054	1
0.878788	0.956667	0.932944	0.98039	1	0.983172	1
0.888889	0.963333	0.94102	0.985647	1	0.983172	1
0.89899	0.963333	0.94102	0.985647	1	0.983172	1
0.909091	0.968333	0.947962	0.988704	1	0.983172	1
0.919192	0.968333	0.947962	0.988704	1	0.983172	1
0.929293	0.968333	0.947962	0.988704	1	0.983172	1
0.939394	0.968333	0.947962	0.988704	1	0.983172	1
0.949495	0.968333	0.947962	0.988704	1	0.983172	1
0.959596	0.968333	0.947962	0.988704	1	0.983172	1
0.969697	0.968333	0.947962	0.988704	1	0.983172	1
0.979798	0.968333	0.947962	0.988704	1	0.983172	1
0.989899	0.968333	0.947962	0.988704	1	0.983172	1
1	1	1	1	1	1	1

## Sheet: 8y
fpr	tpr_internal	tpr_internal_lower	tpr_internal_upper	tpr_external	tpr_external_lower	tpr_external_upper
0	0	0	0	0	0	0
0.010101	0.645167	0.590572	0.699762	0.2	0.131725	0.268275
0.020202	0.645167	0.590572	0.699762	0.25	0.181725	0.318275
0.030303	0.645167	0.590572	0.699762	0.25	0.181725	0.318275
0.040404	0.645167	0.590572	0.699762	0.25	0.181725	0.318275
0.0505051	0.645167	0.590572	0.699762	0.25	0.181725	0.318275
0.0606061	0.645167	0.590572	0.699762	0.25	0.181725	0.318275
0.0707071	0.645167	0.590572	0.699762	0.3	0.231725	0.368275
0.0808081	0.645167	0.590572	0.699762	0.35	0.281725	0.418275
0.0909091	0.645167	0.590572	0.699762	0.35	0.281725	0.418275
0.10101	0.6485	0.594251	0.702749	0.5	0.431725	0.568275
0.111111	0.657667	0.603403	0.711931	0.5	0.430813	0.569187
0.121212	0.657667	0.603403	0.711931	0.5	0.430813	0.569187
0.131313	0.6635	0.60968	0.71732	0.5	0.431686	0.568314
0.141414	0.6635	0.60968	0.71732	0.55	0.481686	0.618314
0.151515	0.687833	0.634725	0.740941	0.55	0.479842	0.620158
0.161616	0.687833	0.634725	0.740941	0.55	0.479842	0.620158
0.171717	0.713667	0.662408	0.764925	0.55	0.478987	0.621013
0.181818	0.713667	0.662408	0.764925	0.55	0.478987	0.621013
0.191919	0.713667	0.662408	0.764925	0.55	0.478987	0.621013
0.20202	0.743	0.693311	0.792689	0.55	0.478663	0.621337
0.212121	0.743	0.693311	0.792689	0.55	0.478663	0.621337
0.222222	0.754667	0.704539	0.804794	0.55	0.478988	0.621012
0.232323	0.754667	0.704539	0.804794	0.55	0.478988	0.621012
0.242424	0.754667	0.704539	0.804794	0.55	0.478988	0.621012
0.252525	0.781667	0.732521	0.830813	0.6	0.529433	0.670567
0.262626	0.781667	0.732521	0.830813	0.6	0.529433	0.670567
0.272727	0.781667	0.732521	0.830813	0.6	0.529433	0.670567
0.282828	0.781667	0.732521	0.830813	0.6	0.529433	0.670567
0.292929	0.806667	0.759623	0.85371	0.65	0.585706	0.714294
0.30303	0.811667	0.765903	0.857431	0.65	0.585706	0.714294
0.313131	0.811667	0.765903	0.857431	0.65	0.585706	0.714294
0.323232	0.811667	0.765903	0.857431	0.65	0.585706	0.714294
0.333333	0.8375	0.793961	0.881039	0.65	0.587179	0.712821
0.343434	0.8375	0.793961	0.881039	0.65	0.587179	0.712821
0.353535	0.8375	0.793961	0.881039	0.65	0.587179	0.712821
0.363636	0.8375	0.793961	0.881039	0.65	0.587179	0.712821
0.373737	0.8375	0.793961	0.881039	0.65	0.587179	0.712821
0.383838	0.850333	0.808437	0.89223	0.65	0.586548	0.713452
0.393939	0.850333	0.808437	0.89223	0.65	0.586548	0.713452
0.40404	0.862333	0.822313	0.902353	0.7	0.636276	0.763724
0.414141	0.862333	0.822313	0.902353	0.7	0.636276	0.763724
0.424242	0.862333	0.822313	0.902353	0.75	0.686276	0.813724
0.434343	0.862333	0.822313	0.902353	0.75	0.686148	0.813852
0.444444	0.869	0.830274	0.907726	0.75	0.685943	0.814057
0.454545	0.869	0.830274	0.907726	0.75	0.685943	0.814057
0.464646	0.869	0.830274	0.907726	0.75	0.685943	0.814057
0.474747	0.869	0.830274	0.907726	0.75	0.685943	0.814057
0.484848	0.869	0.830274	0.907726	0.75	0.685943	0.814057
0.494949	0.869	0.830274	0.907726	0.8	0.735943	0.864057
0.505051	0.902333	0.870247	0.934419	0.8	0.739828	0.860172
0.515152	0.902333	0.870247	0.934419	0.85	0.789828	0.910172
0.525253	0.902333	0.870247	0.934419	0.85	0.789828	0.910172
0.535354	0.902333	0.870247	0.934419	0.85	0.789828	0.910172
0.545455	0.902333	0.870247	0.934419	0.9	0.839828	0.960172
0.555556	0.902333	0.870247	0.934419	0.9	0.839828	0.960172
0.565657	0.902333	0.870247	0.934419	0.9	0.839828	0.960172
0.575758	0.902333	0.870247	0.934419	0.9	0.844361	0.955639
0.585859	0.902333	0.870247	0.934419	0.9	0.844361	0.955639
0.59596	0.902333	0.870247	0.934419	0.9	0.844361	0.955639
0.606061	0.912167	0.88051	0.943824	0.9	0.846681	0.953319
0.616162	0.912167	0.88051	0.943824	0.9	0.846681	0.953319
0.626263	0.918	0.886799	0.949201	0.9	0.847563	0.952437
0.636364	0.918	0.886799	0.949201	0.9	0.847563	0.952437
0.646465	0.918	0.886799	0.949201	0.9	0.847563	0.952437
0.656566	0.918	0.886799	0.949201	0.9	0.847563	0.952437
0.666667	0.9255	0.895524	0.955476	0.9	0.85084	0.94916
0.676768	0.9255	0.895524	0.955476	0.9	0.85084	0.94916
0.686869	0.9255	0.895524	0.955476	0.9	0.85084	0.94916
0.69697	0.9255	0.895524	0.955476	0.95	0.90084	0.99916
0.707071	0.928	0.89819	0.95781	0.95	0.90084	0.99916
0.717172	0.933	0.90355	0.96245	0.95	0.912668	0.987332
0.727273	0.933	0.90355	0.96245	0.95	0.912668	0.987332
0.737374	0.933	0.90355	0.96245	0.95	0.912668	0.987332
0.747475	0.933	0.90355	0.96245	1	0.962668	1
0.757576	0.943333	0.914867	0.9718	1	0.96915	1
0.767677	0.943333	0.914867	0.9718	1	0.96915	1
0.777778	0.943333	0.914867	0.9718	1	0.96915	1
0.787879	0.943333	0.914867	0.9718	1	0.96915	1
0.79798	0.943333	0.914867	0.9718	1	0.96915	1
0.808081	0.950833	0.923106	0.978561	1	0.971119	1
0.818182	0.950833	0.923106	0.978561	1	0.971119	1
0.828283	0.950833	0.923106	0.978561	1	0.971119	1
0.838384	0.955833	0.928654	0.983013	1	0.984877	1
0.848485	0.955833	0.928654	0.983013	1	0.984877	1
0.858586	0.969167	0.950451	0.987883	1	0.986323	1
0.868687	0.969167	0.950451	0.987883	1	0.986323	1
0.878788	0.969167	0.950451	0.987883	1	0.986323	1
0.888889	0.9725	0.95475	0.99025	1	0.986323	1
0.89899	0.9725	0.95475	0.99025	1	0.986323	1
0.909091	0.9725	0.95475	0.99025	1	0.986323	1
0.919192	0.9725	0.95475	0.99025	1	0.986323	1
0.929293	0.9725	0.95475	0.99025	1	0.986323	1
0.939394	0.9725	0.95475	0.99025	1	0.986323	1
0.949495	0.9725	0.95475	0.99025	1	0.986323	1
0.959596	0.9725	0.95475	0.99025	1	0.986323	1
0.969697	0.9725	0.95475	0.99025	1	0.986323	1
0.979798	0.9725	0.95475	0.99025	1	0.986323	1
0.989899	0.9725	0.95475	0.99025	1	0.986323	1
1	1	1	1	1	1	1

## Sheet: 9y
fpr	tpr_internal	tpr_internal_lower	tpr_internal_upper	tpr_external	tpr_external_lower	tpr_external_upper
0	0	0	0	0	0	0
0.010101	0.655782	0.594033	0.717532	0.181818	0.111445	0.252191
0.020202	0.655782	0.594033	0.717532	0.227273	0.1569	0.297646
0.030303	0.655782	0.594033	0.717532	0.227273	0.1569	0.297646
0.040404	0.655782	0.594033	0.717532	0.227273	0.1569	0.297646
0.0505051	0.655782	0.594033	0.717532	0.227273	0.1569	0.297646
0.0606061	0.655782	0.594033	0.717532	0.363636	0.293263	0.43401
0.0707071	0.655782	0.594033	0.717532	0.363636	0.293263	0.43401
0.0808081	0.655782	0.594033	0.717532	0.5	0.429627	0.570373
0.0909091	0.655782	0.594033	0.717532	0.5	0.429627	0.570373
0.10101	0.655782	0.594033	0.717532	0.5	0.429627	0.570373
0.111111	0.655782	0.594033	0.717532	0.5	0.429627	0.570373
0.121212	0.655782	0.594033	0.717532	0.545455	0.475081	0.615828
0.131313	0.655782	0.594033	0.717532	0.545455	0.474809	0.6161
0.141414	0.655782	0.594033	0.717532	0.545455	0.474809	0.6161
0.151515	0.659184	0.597775	0.720592	0.545455	0.475899	0.61501
0.161616	0.659184	0.597775	0.720592	0.545455	0.475899	0.61501
0.171717	0.679762	0.619193	0.740331	0.545455	0.477012	0.613897
0.181818	0.679762	0.619193	0.740331	0.545455	0.477012	0.613897
0.191919	0.679762	0.619193	0.740331	0.545455	0.477012	0.613897
0.20202	0.703571	0.642929	0.764214	0.590909	0.523125	0.658693
0.212121	0.703571	0.642929	0.764214	0.590909	0.523125	0.658693
0.222222	0.703571	0.642929	0.764214	0.590909	0.523125	0.658693
0.232323	0.703571	0.642929	0.764214	0.590909	0.523125	0.658693
0.242424	0.703571	0.642929	0.764214	0.590909	0.523125	0.658693
0.252525	0.74949	0.69194	0.80704	0.590909	0.524223	0.657595
0.262626	0.74949	0.69194	0.80704	0.590909	0.524223	0.657595
0.272727	0.74949	0.69194	0.80704	0.590909	0.524223	0.657595
0.282828	0.74949	0.69194	0.80704	0.636364	0.569678	0.70305
0.292929	0.757993	0.700272	0.815714	0.636364	0.571791	0.700936
0.30303	0.757993	0.700272	0.815714	0.636364	0.571791	0.700936
0.313131	0.757993	0.700272	0.815714	0.636364	0.571791	0.700936
0.323232	0.757993	0.700272	0.815714	0.636364	0.571791	0.700936
0.333333	0.822789	0.772446	0.873132	0.636364	0.574886	0.697841
0.343434	0.822789	0.772446	0.873132	0.636364	0.574886	0.697841
0.353535	0.822789	0.772446	0.873132	0.636364	0.574886	0.697841
0.363636	0.822789	0.772446	0.873132	0.636364	0.574886	0.697841
0.373737	0.822789	0.772446	0.873132	0.636364	0.574886	0.697841
0.383838	0.822789	0.772446	0.873132	0.636364	0.574886	0.697841
0.393939	0.822789	0.772446	0.873132	0.636364	0.574886	0.697841
0.40404	0.85119	0.805828	0.896553	0.727273	0.666151	0.788395
0.414141	0.85119	0.805828	0.896553	0.727273	0.666151	0.788395
0.424242	0.85119	0.805828	0.896553	0.727273	0.666151	0.788395
0.434343	0.85119	0.805828	0.896553	0.727273	0.66592	0.788625
0.444444	0.85119	0.805828	0.896553	0.727273	0.66592	0.788625
0.454545	0.85119	0.805828	0.896553	0.727273	0.66592	0.788625
0.464646	0.85119	0.805828	0.896553	0.727273	0.66592	0.788625
0.474747	0.85119	0.805828	0.896553	0.727273	0.66592	0.788625
0.484848	0.85119	0.805828	0.896553	0.727273	0.66592	0.788625
0.494949	0.85119	0.805828	0.896553	0.727273	0.66592	0.788625
0.505051	0.889286	0.853258	0.925314	0.772727	0.717732	0.827723
0.515152	0.889286	0.853258	0.925314	0.772727	0.717732	0.827723
0.525253	0.889286	0.853258	0.925314	0.818182	0.763186	0.873177
0.535354	0.889286	0.853258	0.925314	0.818182	0.763186	0.873177
0.545455	0.889286	0.853258	0.925314	0.818182	0.763186	0.873177
0.555556	0.889286	0.853258	0.925314	0.818182	0.763186	0.873177
0.565657	0.889286	0.853258	0.925314	0.863636	0.808641	0.918632
0.575758	0.889286	0.853258	0.925314	0.863636	0.812194	0.915079
0.585859	0.889286	0.853258	0.925314	0.863636	0.812194	0.915079
0.59596	0.889286	0.853258	0.925314	0.863636	0.812194	0.915079
0.606061	0.895238	0.859477	0.930999	0.863636	0.816097	0.911175
0.616162	0.895238	0.859477	0.930999	0.863636	0.816097	0.911175
0.626263	0.895238	0.859477	0.930999	0.863636	0.816097	0.911175
0.636364	0.895238	0.859477	0.930999	0.863636	0.816097	0.911175
0.646465	0.895238	0.859477	0.930999	0.863636	0.816097	0.911175
0.656566	0.895238	0.859477	0.930999	0.863636	0.816097	0.911175
0.666667	0.921599	0.890618	0.952579	0.863636	0.821535	0.905738
0.676768	0.921599	0.890618	0.952579	0.863636	0.821535	0.905738
0.686869	0.921599	0.890618	0.952579	0.909091	0.86699	0.951192
0.69697	0.921599	0.890618	0.952579	0.909091	0.86699	0.951192
0.707071	0.921599	0.890618	0.952579	1	0.957899	1
0.717172	0.921599	0.890618	0.952579	1	0.959437	1
0.727273	0.921599	0.890618	0.952579	1	0.959437	1
0.737374	0.921599	0.890618	0.952579	1	0.959437	1
0.747475	0.921599	0.890618	0.952579	1	0.959437	1
0.757576	0.932653	0.902595	0.962711	1	0.964104	1
0.767677	0.932653	0.902595	0.962711	1	0.964104	1
0.777778	0.932653	0.902595	0.962711	1	0.964104	1
0.787879	0.932653	0.902595	0.962711	1	0.964104	1
0.79798	0.932653	0.902595	0.962711	1	0.964104	1
0.808081	0.947449	0.924383	0.970515	1	0.97343	1
0.818182	0.947449	0.924383	0.970515	1	0.97343	1
0.828283	0.947449	0.924383	0.970515	1	0.97343	1
0.838384	0.95	0.927255	0.972745	1	0.974962	1
0.848485	0.95	0.927255	0.972745	1	0.974962	1
0.858586	0.95	0.927255	0.972745	1	0.974962	1
0.868687	0.95	0.927255	0.972745	1	0.974962	1
0.878788	0.95	0.927255	0.972745	1	0.974962	1
0.888889	0.95	0.927255	0.972745	1	0.974962	1
0.89899	0.95	0.927255	0.972745	1	0.974962	1
0.909091	0.95	0.927255	0.972745	1	0.974962	1
0.919192	0.95	0.927255	0.972745	1	0.974962	1
0.929293	0.95	0.927255	0.972745	1	0.974962	1
0.939394	0.95	0.927255	0.972745	1	0.974962	1
0.949495	0.95	0.927255	0.972745	1	0.974962	1
0.959596	0.95	0.927255	0.972745	1	0.974962	1
0.969697	0.95	0.927255	0.972745	1	0.974962	1
0.979798	0.95	0.927255	0.972745	1	0.974962	1
0.989899	0.95	0.927255	0.972745	1	0.974962	1
1	1	1	1	1	1	1
